# Supplementary material for: CAMELE: Collocation-Analyzed Multi-source Ensembled Land Evapotranspiration Data
Source: Copernicus journal article supplement (doi:10.5194/essd-2023-226), 2023-07-17
Supplement: Supplementary file 1 [file essd-2023-226-supplement.pdf]

**CAMELE: Collocation-Analyzed Multi-source Ensembled Land  
Evapotranspiration Data**

Changming Li<sup>1</sup>, Ziwei Liu<sup>1</sup>, Wencong Yang<sup>1</sup>, Zhuoyi Tu<sup>1</sup>, Juntai Han<sup>1</sup>, Sien Li<sup>2</sup>,  
Hanbo Yang<sup>1\*</sup>

<sup>1</sup>State Key Laboratory of Hydrosience and Engineering, Department of Hydraulic  
Engineering, Tsinghua University. Beijing 100084, China

<sup>2</sup>Center for Agricultural Water Research in China, China Agricultural University,  
Beijing 100083, China

\*Correspondence: Hanbo Yang ([yanghanbo@tsinghua.edu.cn](mailto:yanghanbo@tsinghua.edu.cn))

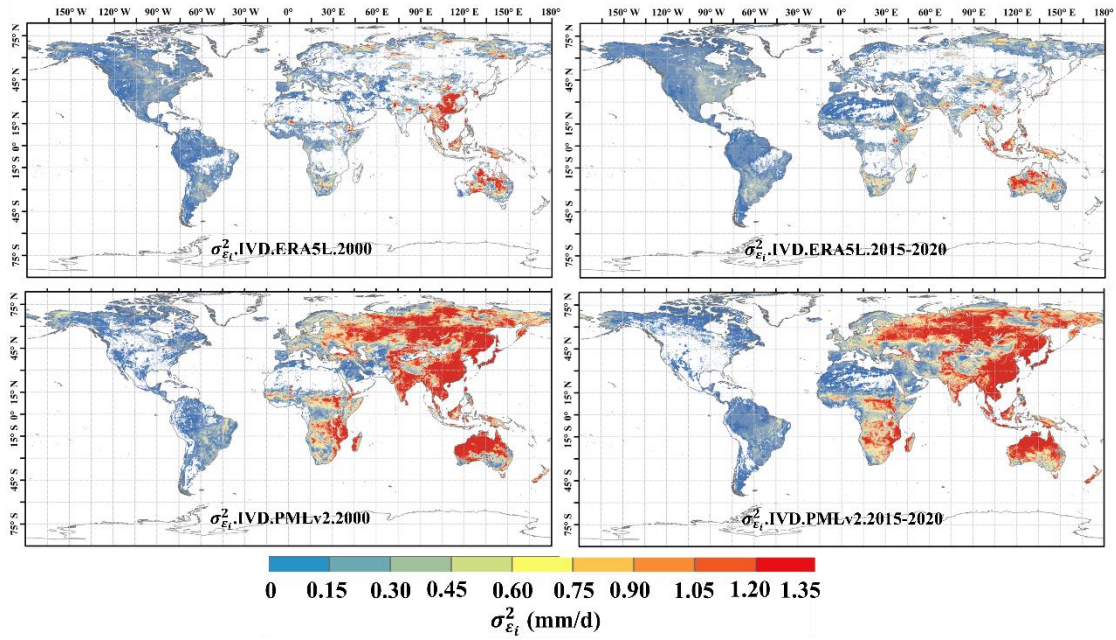

**FIGURE.S1** Global distribution of absolute error variances ( $\sigma_{\epsilon_i}^2$ ) of ERA5L and PMLv2 using IVD at a resolution of  $0.1^\circ$  during the period 2000 and 2015-2020.

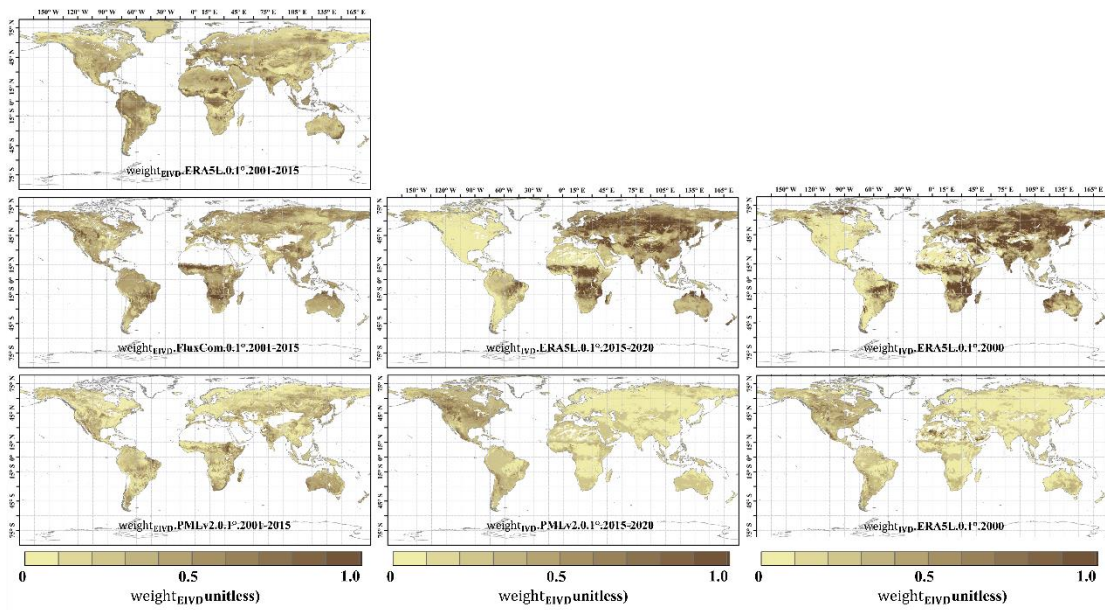

**FIGURE.S2** Global distribution of optimal weights at  $0.1^\circ$ .

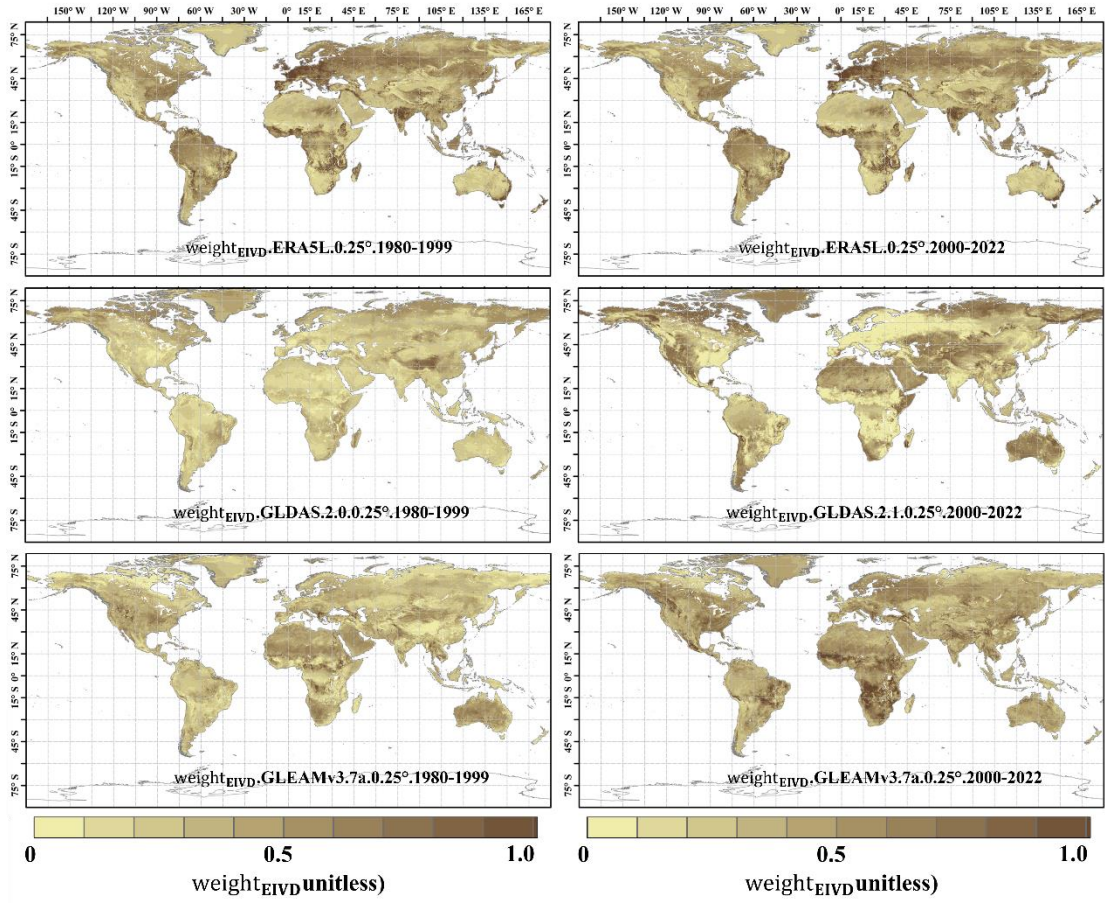

**FIGURE.S3** Global distribution of optimal weights at 0.25°.
